# Supplementary material
Source: MDPI journal article supplement (https://www.mdpi.com/2071-1050/13/4/2076)
Supplement: s1 [file s1]

## Supplementary Material

### Alternative Tourism and Environmental Impacts: Perception of Residents of an Extractive Reserve in the Brazilian Amazonia

Heloise Michelle Nunes Medeiros <sup>1,2\*</sup>, Quêzia Leandro de Moura Guerreiro <sup>2</sup>, Thiago Almeida Vieira <sup>1,3</sup>, Sandra Maria Sousa da Silva <sup>4</sup>, Ana Isabel da Silva Aço Renda <sup>5</sup>, and José Max Barbosa Oliveira-Junior <sup>1,2,\*</sup>

<sup>1</sup> Programa de Pós-Graduação em Sociedade, Ambiente e Qualidade de Vida (PPGSAQ), Universidade Federal do Oeste do Pará (UFOPA), Rua Vera Paz, s/n (Unidade Tapajós) Bairro Salé, Santarém 68040-255, Pará, Brazil; heloise\_medeiros28@hotmail.com (H.M.N.M.); thiago.vieira@ufopa.edu.br (T.A.V.); jose.mbo@ufopa.edu.br (J.M.B.O.-J.)

<sup>2</sup> Instituto de Ciências e Tecnologia das Águas (ICTA), Universidade Federal do Oeste do Pará (UFOPA), Rua Vera Paz, s/n (Unidade Tapajós) Bairro Salé, Santarém 68040-255, Pará, Brazil; heloise\_medeiros28@hotmail.com (H.M.N.M.); queziamoura@hotmail.com (Q.L.M.G.); jose.mbo@ufopa.edu.br (J.M.B.O.-J.)

<sup>3</sup> Instituto de Biodiversidade e Florestas (IBEF), Universidade Federal do Oeste do Pará (UFOPA), Rua Vera Paz, s/n (Unidade Tapajós) Bairro Salé, Santarém 68040-255, Pará, Brazil; thiago.vieira@ufopa.edu.br

<sup>4</sup> Centro de Formação Interdisciplinar (CFI), Universidade Federal do Oeste do Pará (UFOPA), Rua Vera Paz, s/n (Unidade Tapajós) Bairro Salé, Santarém 68040-255, Pará, Brazil; sandra.silva@ufopa.edu.br

<sup>5</sup> Escola Superior de Gestão, Hotelaria e Turismo (ESGHT), Universidade do Algarve (UALg), Campus da Penha, Estrada da Penha 8000, Faro, Portugal; arenda@ualg.pt

\* Correspondence: heloise\_medeiros28@hotmail.com (H.M.N.M.) or jose.mbo@ufopa.edu.br (J.M.B.O.-J)

**Table S1:** Roadmap for data collection of RESEX residents Tapajós-Arapuiuns, Brazilian Amazonia.

|                                                               |
|---------------------------------------------------------------|
| Researcher: _____ Questionnaire number: _____                 |
| Date: ____/____/2019.                                         |
| <b>GROUP A: INTERVIEWEE DATA</b>                              |
| 1. Community: _____                                           |
| 2. Name: _____                                                |
| 3. Gender: ( ) Female ( ) Male                                |
| 4. Age: _____                                                 |
| 5. Residence time: _____                                      |
| 6. Where were you born? _____                                 |
| 7. Color / race: ( ) White ( ) Black ( ) Brown ( ) Indigenous |
| 8. Scholarity?                                                |
| ( ) No schooling                                              |
| ( ) Incomplete elementary school                              |
| ( ) Complete primary education                                |
| ( ) Incomplete high school                                    |
| ( ) Complete high school                                      |

- ( ) Complete higher education  
( ) Incomplete higher education  
( ) Graduated: \_\_\_\_\_

#### GROUP B: SOCIOECONOMIC DATA

9. Do you have internet access? ( ) Yes ( ) No  
10. Do you have a television at home? ( ) Yes ( ) No  
11. Do you have a radio? ( ) Yes ( ) No  
12. Do you have a cell phone? ( ) Yes ( ) No  
13. Does the community have a health post? ( ) Yes ( ) No  
14. Does the community have school? ( ) Yes ( ) No  
15. What is your main occupation? \_\_\_\_\_  
16. What is the approximate family income? \_\_\_\_\_  
17. Does the family receive financial assistance from the government? ( ) Yes ( ) No  
( ) Family allowance ( ) Defeso Insurance ( ) Others: \_\_\_\_\_  
18. Do you receive any technical assistance? ( ) Yes ( ) No  
( ) EMATER PA<sup>1</sup> ( ) EMBRAPA<sup>2</sup> ( ) ICMBIo<sup>3</sup> ( ) PSA<sup>4</sup> ( ) Other  
19. Do you know the RESEX<sup>5</sup> Management Plan? ( ) Yes ( ) No ( ) Little  
20. How is the water supply of your home made?  
( ) Microsystem ( ) Well ( ) River/Igarapé/Lake ( ) Others: \_\_\_\_\_  
21. What is the sewer system?  
( ) Septic tank ( ) Black tank ( ) Clear sky  
( ) Others: \_\_\_\_\_  
22. What is the destination of your home's garbage?  
( ) Dumping ground ( ) Burnt ( ) Buried ( ) Clear sky  
( ) Others: \_\_\_\_\_  
23. Do you have electricity at home? ( ) Yes ( ) No  
( ) Distribution network ( ) Own generator ( ) Community generator ( ) Solar plate

#### GROUP C: PERCEPTION OF CONCEPT AND ENVIRONMENTAL IMPACTS OF ALTERNATIVE TOURISM IN THE COMMUNITY

24. Could you say what alternative tourism is? ( ) Yes ( ) No

\_\_\_\_\_

25. Can you say what an environmental impact is? ( ) Yes ( ) No

\_\_\_\_\_

26. What are the positive impacts that tourism brings to the community?

---

27. Do you notice negative impacts caused by tourism in the community?

( ) Yes. Which ones are they? ( ) No ( ) Did not answer

---

28. Is there a fee for tourists to enter the community?

( ) Yes ( ) No ( ) Did not answer

29. Today tourism is the main activity that brings income to the community?

( ) Yes ( ) No ( ) Did not answer

30. Do you know if the number of people who work with tourism in the community has grown?

( ) Yes ( ) No ( ) Did not answer

31. Do you notice the rise in trade prices because of tourism?

( ) Yes ( ) No ( ) Did not answer

32. Do you know if there is interaction between tourists and locals?

( ) Yes ( ) No ( ) Did not answer

33. In the last few years, do you notice if the residents have changed their customs/way of speaking/way of dressing because of contact with tourists?

( ) Yes. Which ones are they? ( ) No ( ) Did not answer

---

34. Does tourism bring more recreational options to the (cultural) community?

( ) Yes ( ) No ( ) Did not answer

35. Do you know if there is violence in the community because of tourism?

( ) Yes ( ) No ( ) Did not answer

36. Do you know sexual exploitation in the community because of tourism?

( ) Yes ( ) No ( ) Did not answer

37. Do you realize if because of tourism the government (Municipal/State/Federal) started to invest more in the community?

( ) Yes ( ) No ( ) Did not answer

38. If so, in what sectors was the improvement?

( ) Water supply

( ) Transport

( ) Safety

( ) Sanitation

( ) Communication

( ) Cheers

( ) Education

( ) Training

( ) Others: \_\_\_\_\_

**39.** Do you notice any intervention by the government (Municipal/State/Federal) or NGOs<sup>6</sup> so that the community's environment remains conserved? (Avoid impacts)

( ) Yes            ( ) No                      ( ) Did not answer

Government? \_\_\_\_\_

NGOs? \_\_\_\_\_

Could you say what has already been done? \_\_\_\_\_

**40.** Do you know if the community has had any training carried out by the government (Municipal/State/Federal) or NGOs for tourism to be developed in the community?

( ) Yes            ( ) No                      ( ) Did not answer

Government? \_\_\_\_\_

NGOs? \_\_\_\_\_

What training? \_\_\_\_\_

**41.** Do you perceive if tourists leave waste on the beaches, rivers, trails, or in the streets of the community?

( ) Yes. Which ones are they?    ( ) No                      ( ) Did not answer

\_\_\_\_\_

**42.** Do you perceive if the boats leave residues on the beaches or rivers?

( ) Yes. Which ones are they?    ( ) No                      ( ) Did not answer

\_\_\_\_\_

**43.** Do tourists cause visual pollution in the environments visited?

( ) Yes. Which ones are they?    ( ) No                      ( ) Did not answer

\_\_\_\_\_

**44.** Do tourists cause noise pollution in the environments they visit?

( ) Yes. Which ones are they?    ( ) No                      ( ) Did not answer

\_\_\_\_\_

**45.** Do you perceive changes in the landscape due to tourism in the community??

( ) Yes. Which ones are they?    ( ) No                      ( ) Did not answer

\_\_\_\_\_

**46.** Do tourists take any animals or plants from the community?

( ☐ ) Yes. Which ones are they? ( ☐ ) No ( ☐ ) Did not answer

**47.** Do you want tourism to develop in the community?

( ☐ ) Yes ( ☐ ) No

<sup>1</sup> Company for Technical Assistance and Rural Extension of the State of Pará (EMATER-PA); <sup>2</sup> Brazilian Agricultural Research Corporation (EMBRAPA); <sup>3</sup> Chico Mendes Institute for Biodiversity Conservation (ICMBio); <sup>4</sup> Health and Happiness Project (PSA); <sup>5</sup> Extractive Reserve (RESEX); <sup>6</sup> Non-governmental Organizations (NGOs).
